# Supplementary material for: Atomically thin two-dimensional hybrid perovskites using hydrophobic superalkali cations with tunable electron transition type
Source: Royal Society of Chemistry journal article supplement (doi:10.1039/d3cp03721e), 2023-01-01
Supplement: d3cp03721e1.pdf [file d3cp03721e1.pdf]

## Supporting Information

# Atomically thin two-dimensional hybrid perovskites using hydrophobic superalkali cations with tunable electron transition type

Tingwei Zhou<sup>\*a</sup>, Bin Shao<sup>b</sup>

<sup>a</sup>Chongqing key Laboratory of Micro&Nano Structure Optoelectronics, School of Physical Science and Technology, Southwest University, Chongqing 400715, China

Corresponding Author \*Email: twzhou@swu.edu.cn

<sup>b</sup>China Academy of Space Technology (Xi'an), Xi'an, China 710110

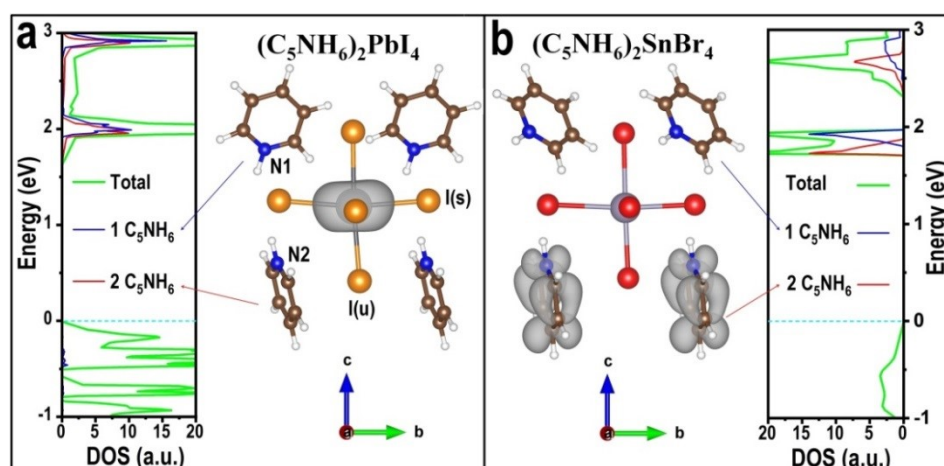

**Fig. S1.** The total/partial DOSs and the CBM (grey) charge density of the 2D (a)  $(\text{C}_5\text{NH}_6)_2\text{PbI}_4$  and (b)  $(\text{C}_5\text{NH}_6)_2\text{SnBr}_4$  with an unit cell, respectively. Atomic colors: H (white), C (coffee), N (blue), Br (red), I (orange), Sn (silver), and Pb (grey).

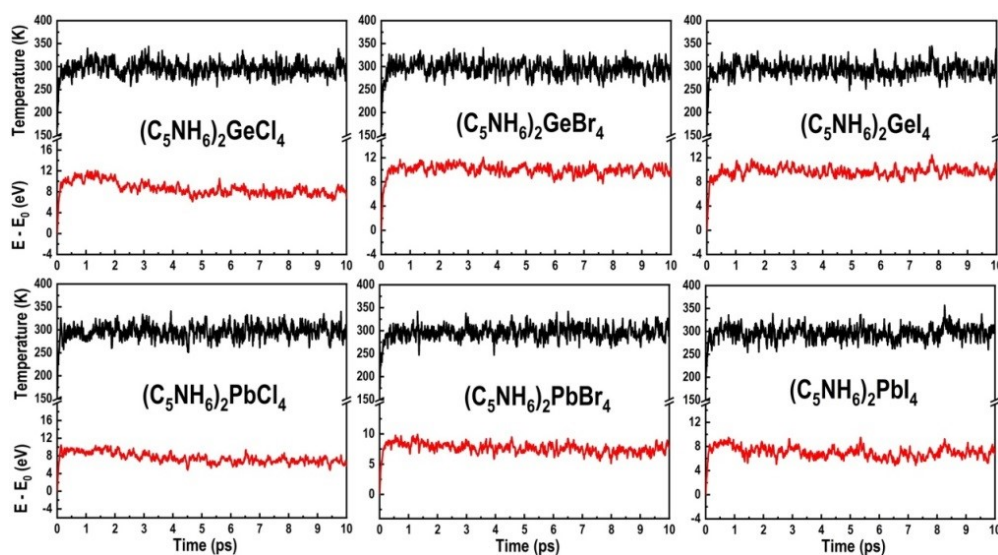

**Fig. S2.** The AIMD simulated energy and temperature curves of the 2D perovskites with a  $3 \times 3 \times 1$  supercell under 300 K and  $10^5$  Pa.

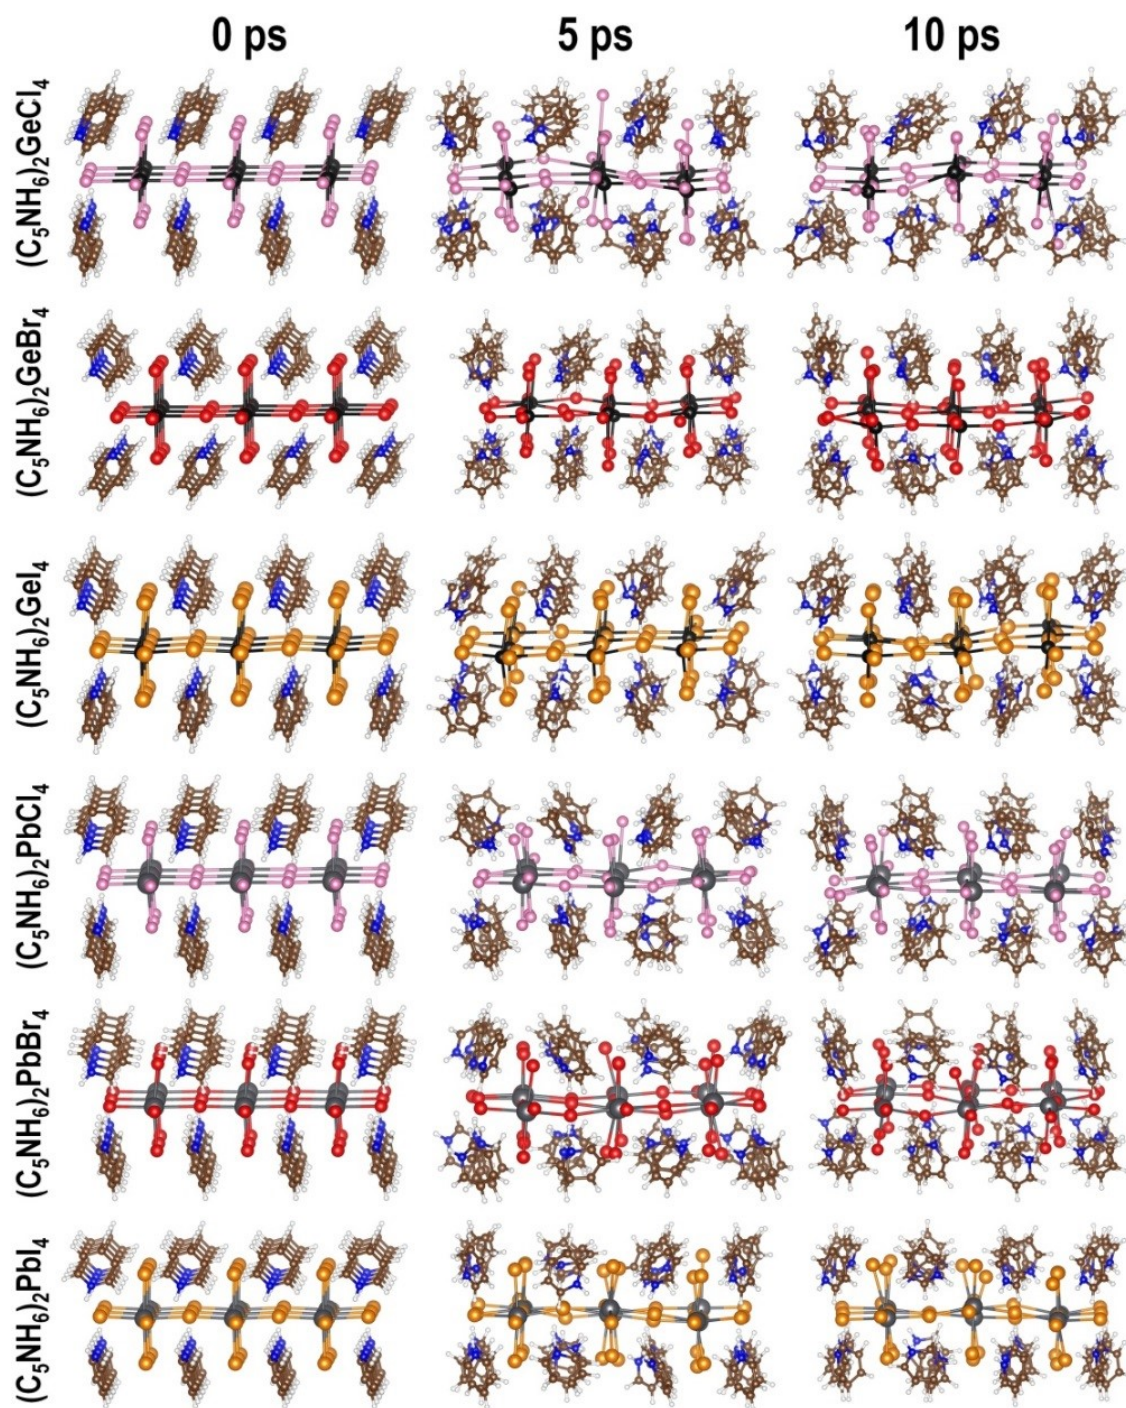

Fig. S3. The AIMD simulated structures of the 2D perovskites with a  $3\times 3\times 1$  supercell under 300 K and  $10^5$  Pa, respectively. Atomic colors: H (white), C (coffee), N (blue), Cl (pink), Br (red), I (orange), Ge (black), and Pb (grey).

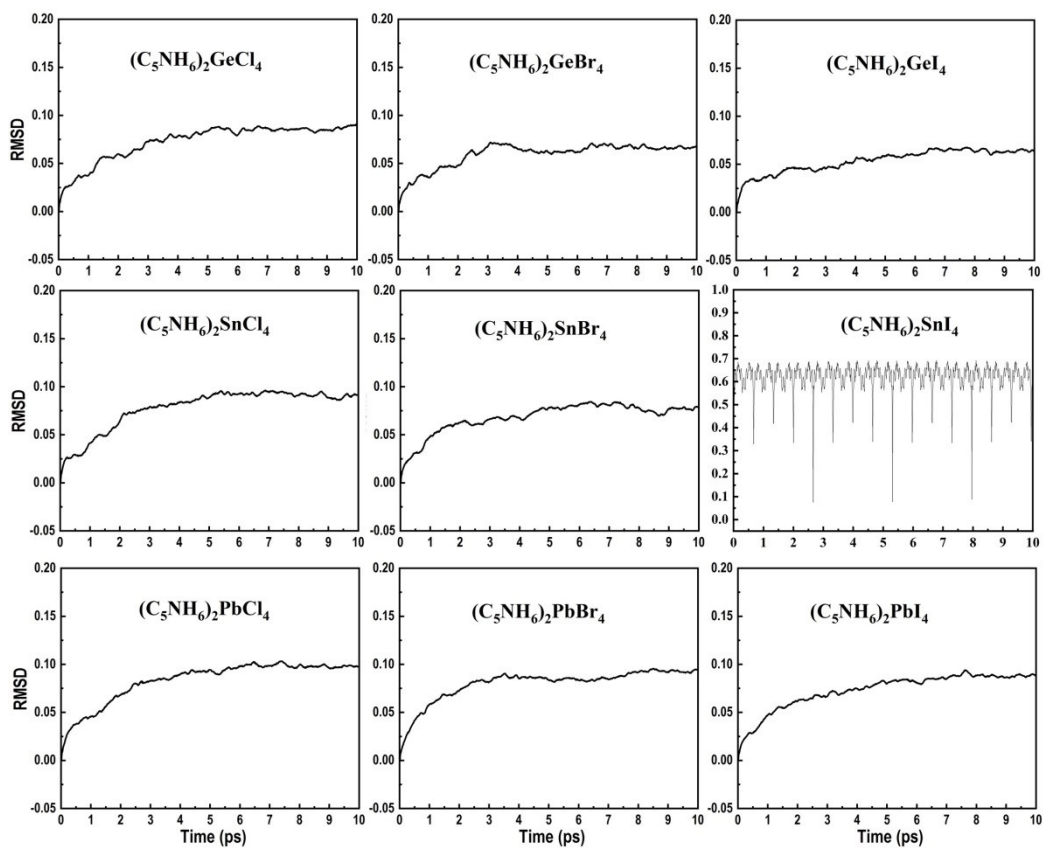

Fig. S4. The root mean square deviation (RMSD) of the 2D perovskites.

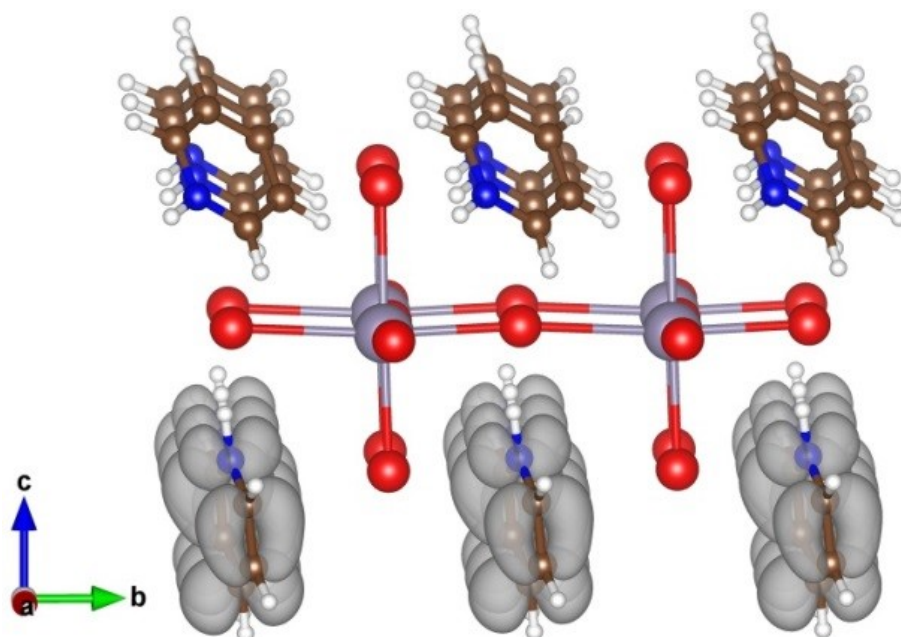

Fig. S5. The CBM (grey) charge density of the 2D  $(\text{C}_5\text{NH}_6)_2\text{SnBr}_4$  with a  $2 \times 2 \times 1$  supercell. Atomic colors: H (white), C (coffee), N (blue), Br (red), and Sn (silver) (grey).

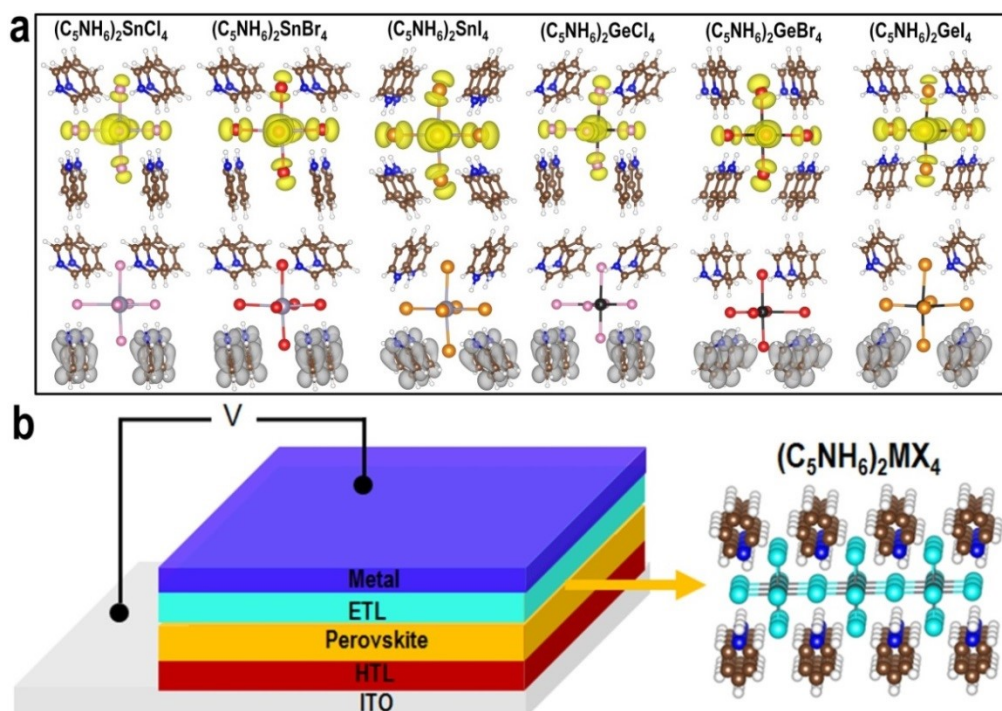

**Fig. S6.** (a) The charge density of VBM (yellow) and CBM (grey) states for the 2D  $(\text{C}_5\text{NH}_6)_2\text{Sn}/\text{GeX}_4$  perovskites (isovalue =  $0.002 \text{ e}/\text{\AA}^3$ ). (b) The model of the light-emitting diode. ITO, HTL and ETL represent indium tin oxide, hole and electron transport layers, respectively. Atomic colors: H (white), C (coffee), N (blue), Br (red), I (orange), and Ge (black), and Sn (silver).
